# Supplementary material
Source: Springer Nature journal article supplement (https://www.springermedizin.de/resource/supplementary/12889_2012_4556_MOESM1_ESM.pdf/9490462)
Supplement: MOESM1 [file 9490462]

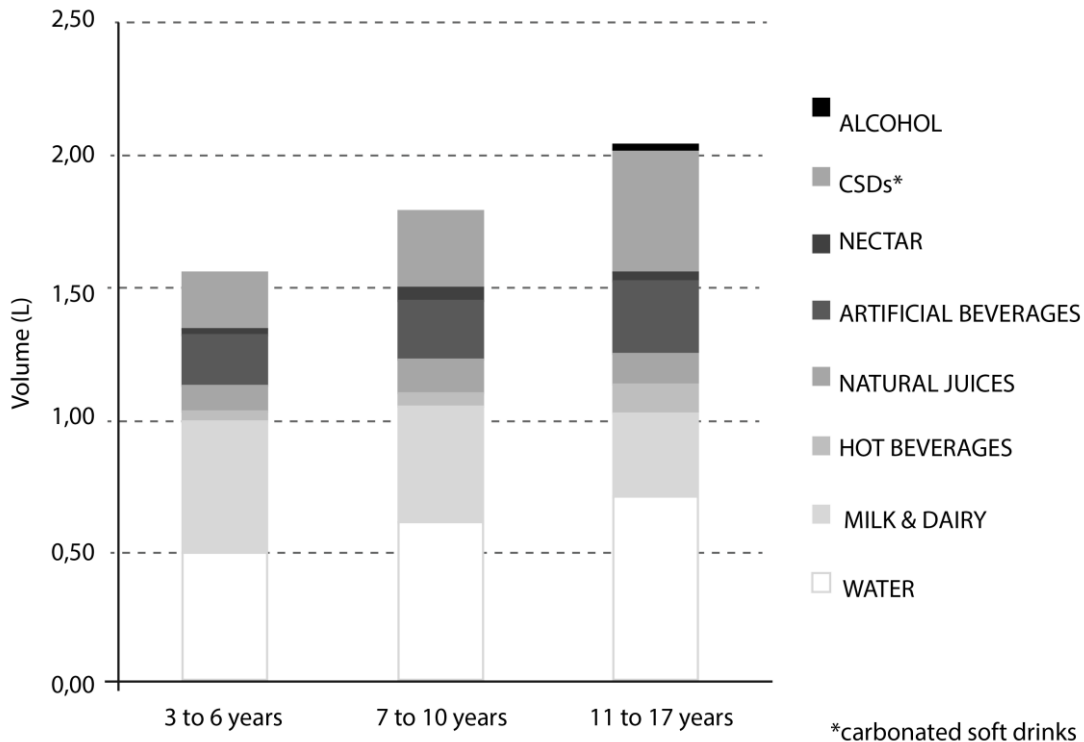

Flavored water, functional and other categories: they are not presented on the figure due to insignificant consumption.
